# Supplementary material for: Catalytic Ozonation for Phenol Removal over Cobalt-doped α-MnO2 Catalyst: Performance and Mechanism
Source: Research Square preprint supplement (doi:10.21203/rs.3.rs-1194666/v1), 2022-01-31
Supplement: Supplementary file 1 [file 8a693a5c3f7af7223783d0ce.docx]

**Supplmentary Material**

**Catalytic Ozonation for Phenol Removal over Cobalt-doped α-MnO2 Catalyst : Performance and Mechanism**

Jie Zhang1, Ben Dong1, Ying Han1, Xiaocui Zhan2, Sijie Ge1, Shilong He1∗

1College of Environmental and Spatial Informatics, China University of Mining and Technology

2Tongling Nonferrous Design & Research Institute Co., Ltd Tongling 244000, Anhui Province, PR China

∗Corresponding author:

Name: Shilong He

Phone numbers: 86-516-83591328

E-mail: hslongrcees@163.com

Professor, PhD.

School of Environment and Spatial Informatics

China University of Mining and Technology

**Selection of catalyst doping ratio**

We prepared catalysts with different initial molar ratio of Co and Mn(0.1, 0.2, 0.3, 0.4 and 0.5 respectively). The sample with Co/Mn=0.2 had the highest catalytic ozonation of phenol (Figure S1).

Fig. S1 ozonation and catalytic ozonation by α-MnO2 and Co doped α-MnO2 with different Co/Mn molar ratios
